# Supplementary material for: Gold nanoparticles improve metabolic profile of mice fed a high-fat diet
Source: PubMed Central journal article supplement (PMC5800098; doi:10.1186/s12951-018-0338-1), 2018-02-06
Supplement: 12951_2018_338_MOESM1_ESM.pdf [file 12951_2018_338_MOESM1_ESM.pdf]

1 **Supplementary materials**

2 **Gold-nanoparticles improve metabolic profiles in high-fat diet mice**

3 Hui Chen <sup>1,2\*</sup>, Jane P M Ng <sup>1\*</sup>, Yi Tan <sup>1</sup>, Kristine McGrath <sup>1,2</sup>, Brian Oliver<sup>1,2</sup>, David P Bishop <sup>3</sup>,  
4 Michael B Cortie <sup>4</sup>, Bruce K Milthorpe <sup>1,2</sup>, Stella M Valenzuela <sup>1,2</sup>

5

6 1. Molecular Biosciences Team, School of Life Sciences, Faculty of Science, University of  
7 Technology Sydney. NSW 2007, Australia

8 2. Centre for Health Technology, University of Technology Sydney, NSW 2007, Australia

9 3. School of Mathematical and Physical Sciences, Faculty of Science, University of Technology  
10 Sydney, NSW, 2007, Australia

11 4. Institute for Nanoscale Technology, University of Technology Sydney. NSW 2007, Australia

12 \* *These authors contributed equally to this work.*

13

14 **Corresponding Author**

15 Associate Professor Stella M Valenzuela, Molecular Biosciences Team, School of Life Sciences,  
16 Faculty of Science, University of Technology Sydney. NSW 2007, Australia. Phone: 61 2 9514 1917.

17 Fax: 61 2 9514 8206. E-mail: Stella.Valenzuela@uts.edu.au

18

19 **Running title:** Gold-nanoparticles in treating obesity

20

21 **Supplementary Materials and Methods**

22 *Histology analysis:*

23 Fixed abdominal fat tissue samples were embedded in paraffin and sectioned. Adipocyte cell size was

24 measured in hematoxylin and eosin (H&E) stained tissues by quantification of >800 cells from each

25 section by Image J software (Image J, National Institutes of Health, MD, USA).

26 *In vitro experiments:*

27 The RAW264.7 macrophage cells (MΦ, originate CL-173, ATCC®, Manassas, VA, USA) were  
28 kindly given by A/Prof O'Brien (University of Technology Sydney). The Murine 3T3-L1 fibroblast  
29 cells (adherent, originate TIB-71, ATCC®, Manassas, VA, USA) were kindly given by Dr. Fei  
30 (University of New South Wales). All cell-lines were maintained at 5% CO<sub>2</sub> and 37°C. Cell viability  
31 was determined using 3-(4,5-dimethylthiazol-2-yl)-2,5-diphenyltetrazolium bromide (MTT) assay  
32 (Sigma Aldrich, St. Louis, MO). MΦ cell line was maintained in DMEM supplemented with fetal  
33 bovine serum and penicillin/streptomycin. MΦ were treated with low dose (MΦ-LAu, 0.315 μg/ml)  
34 and high dose (MΦ-HAu, 3.15 μg/ml) of AuNPs. PBS treatment was used as negative control (MΦ-  
35 C). Lipopolysaccharide (LPS) treatments (1 ng/ml and 10 μg/ml) were used as positive controls. The  
36 cells were harvested at 1, 24, and 72 h.

37 Murine 3T3-L1 fibroblast was differentiated into mature adipocytes using a previously published  
38 protocol<sup>1,2</sup>. The differentiated mature 3T3-L1 adipocytes were treated with the same two doses of  
39 AuNPs as the MΦ, yielding three groups: control (AD-C); low dose AuNP (AD-LAu, 0.315 μg/ml);  
40 high dose AuNP (AD-HAu, 3.15 μg/ml) and collected at the same time points. In another experiment,  
41 pre-adipocytes were continuously treated with AuNPs (3.15 μg/ml, every second day) during the  
42 differentiation from day 0. The cells were collected when the adipocytes matured at day 8.

43 MΦ and mature 3T3-L1 adipocytes were co-cultured with a starting ratio of 1:15 as per published  
44 protocol<sup>3</sup>. The macrophage and adipocyte co-culture system was treated with the same two doses of  
45 AuNPs as stated above.

46

47 *Inductively-coupled plasma-mass spectrometry (ICP-MS):* Tissue samples (~0.02–0.1 g) were  
48 dehydrated using a series of graded alcohols and freeze drying (Alpha 1-2 LDplus freeze dryer,  
49 CHRIST® GmbH, Osterode am Harz, Germany). Dried tissues were powdered and step digested in  
50 a highly corrosive mixture of nitric acid (HNO<sub>3</sub>), hydrochloric acid (HCl), and hydrogen peroxide  
51 (1:2:1, v:v:v) from Baseline® Seastar Chemicals, BC, Canada. The acid-digested samples were then

52 diluted with equal volume of water and refrigerated for subsequent analysis using ICP-MS as per  
53 previous publication<sup>4</sup>. Agilent Technologies 7500cx ICP-MS (Agilent Technologies, VIC, Australia)  
54 was used with sample introduction via a MicroMist concentric nebulizer (Glass Expansion, VIC,  
55 Australia) and a Scott type double pass spray chamber cooled to +2°C. The ICP-MS extraction lens  
56 conditions were selected to maximize the sensitivity of a 1% HNO<sub>3</sub>/HCl (1:2, v:v) (Choice Analytical,  
57 NSW, Australia). Helium was added into the octopole reaction cell to reduce interference. Calibration  
58 curves were constructed using a certified Au calibration standard (Choice Analytical, NSW,  
59 Australia) matrix matched with a concentration range (0–1,000 ng mL<sup>-1</sup>). The results were analyzed  
60 using Agilent Technologies MassHunter Workstation software.

61

62 *Cellular oxidative stress:* The concentration of intracellular ROS was determined using a modified  
63 2',7'-dichlorofluorescein diacetate (H<sub>2</sub>-DCFDA, Sigma Aldrich, MO, USA) method. Briefly, all the  
64 cells were incubated with H<sub>2</sub>-DCFDA (10 μM) in DPBS for 12 min in the dark. The fluorescence  
65 signal was measured (485 nm excitation, 530 nm emission) using Infinite M200® Pro plate reader  
66 (Tecan Deutschland GmbH, Crailsheim, Germany). ROS was adjusted to the cell viability of adjacent  
67 wells and expressed as fold differences relative to the control.

68

69 *Western blot analysis:* Whole cell protein lysate was extracted from RAW264.7 macrophages using  
70 RIPA lysis buffer (50 mL) and protease inhibitor cocktail (Sigma Aldrich, MO, USA). Protein  
71 samples were separated on NuPage® Novex® 4-12% Bis-Tris gels (Life Technologies, CA, USA)  
72 and then transferred to PVDF membranes (Thermo Scientific, MA, USA), which were then incubated  
73 with the primary antibodies (TNFα (1:1,000, Merck Millipore, MA, USA); TLR-4 (1:500) and β-  
74 actin (1:1,000, Santa Cruz Biotechnology, TX, USA)), followed by secondary antibodies (goat anti-  
75 rabbit or goat anti-mouse IgG horseradish peroxidase-conjugated secondary antibody (1:5,000–  
76 10,000, Santa Cruz Biotechnology, TX, USA).

77 *Cellular glucose uptake:* Glucose uptake was measured in mature adipocytes pre-treated with PBS

78 (AD-C), low dose of AuNP (AD-LAu,  $0.315 \mu\text{g mL}^{-1}$ ) or high dose of AuNP (AD-HAu,  $3.15 \mu\text{g mL}^{-1}$ ) for 24 h. The adipocytes were then incubated at difference ambient glucose concentrations (5 mM  
79  $^{-1}$ ) for 24 h. The adipocytes were then incubated at difference ambient glucose concentrations (5 mM  
80 and 10 mM) and insulin (100 nM) for 5, 20, and 60 min.

81

82 **Supplementary Results**

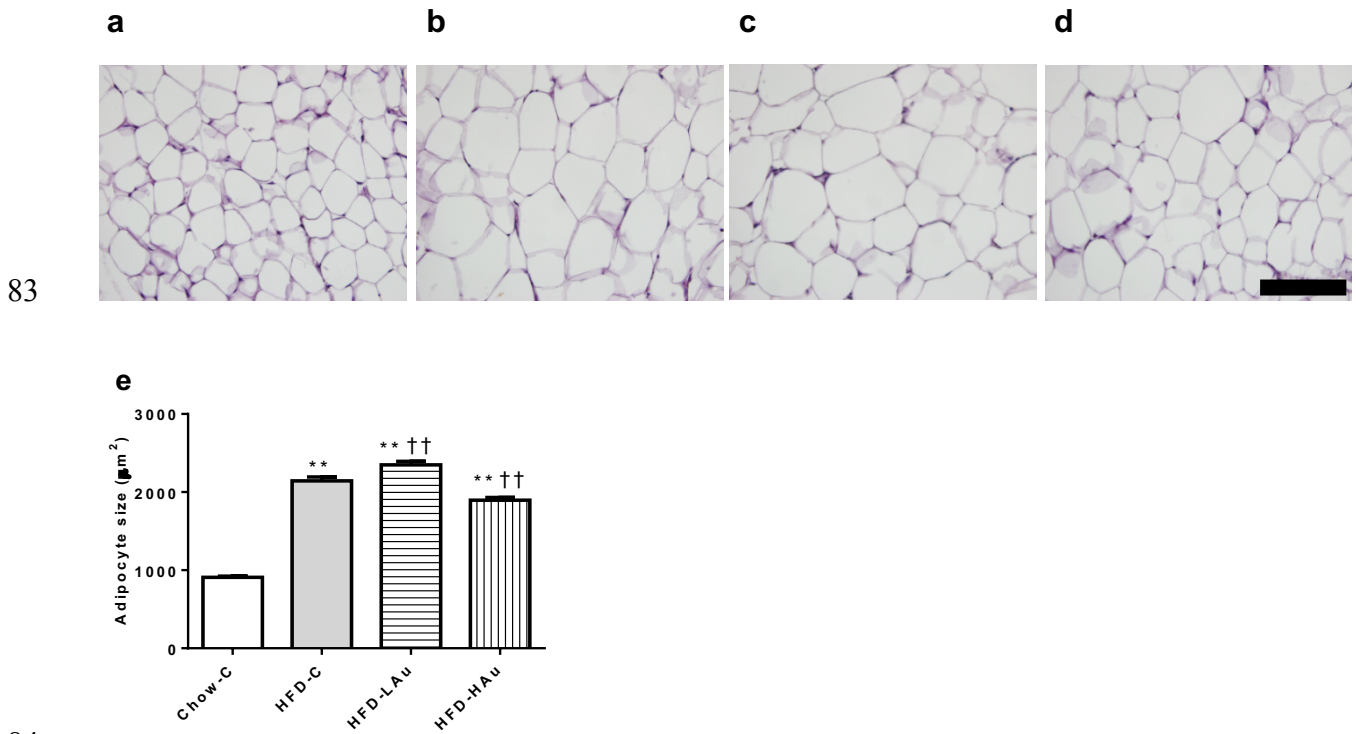

85 **Supplementary Figure S1** Effects of 9 weeks HFD and AuNP treatment on the size of mesenteric  
86 adipose tissue determined by H&E. Representative image of mesenteric adipose tissue stained with  
87 H&E for (a) Chow-C, (b) HFD-C, (c) HFD-LAu and, (d) HFD-HAu mice at 9 weeks. Images were  
88 taken at 40x magnification, scale bar=100 µm for (a–d). (e) Adipocyte size measured from H&E  
89 tissue sections by ImageJ. Results are expressed as mean ± S.E.M. Data were analysed by one-way  
90 ANOVA followed by *post hoc* Bonferroni test, \*\*  $P < 0.01$  vs. Chow-C; ††  $P < 0.01$  vs. HFD-C;  $n = 3$ .

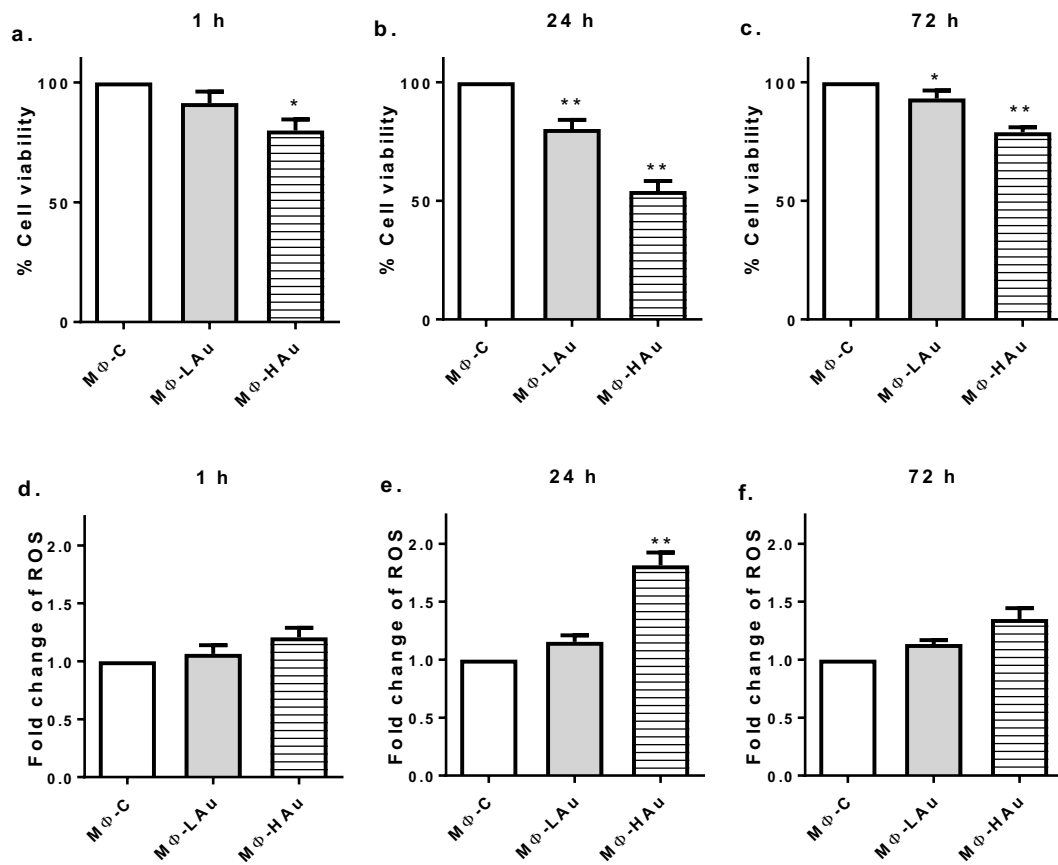

91

92 **Supplementary Figure S2:** Cell viability (a–c) and fold changes in ROS production standardized by  
 93 cell viability (d–f) in AuNP-treated RAW 264.7 macrophages (MΦ) in at 1, 24 and 72h. Results are  
 94 expressed as mean ± S.E.M. Data were analyzed by one-way ANOVA followed by *post hoc* Bonferroni  
 95 test, \*  $P < 0.05$  vs. MΦ-C; \*\*  $P < 0.01$  vs. MΦ-C;  $n = 3-4$ . MΦ-C: control; MΦ-LAu: 0.315 μg/ml, low  
 96 dose AuNP treatment; MΦ-HAu: 3.15 μg/ml, high dose AuNP treatment.

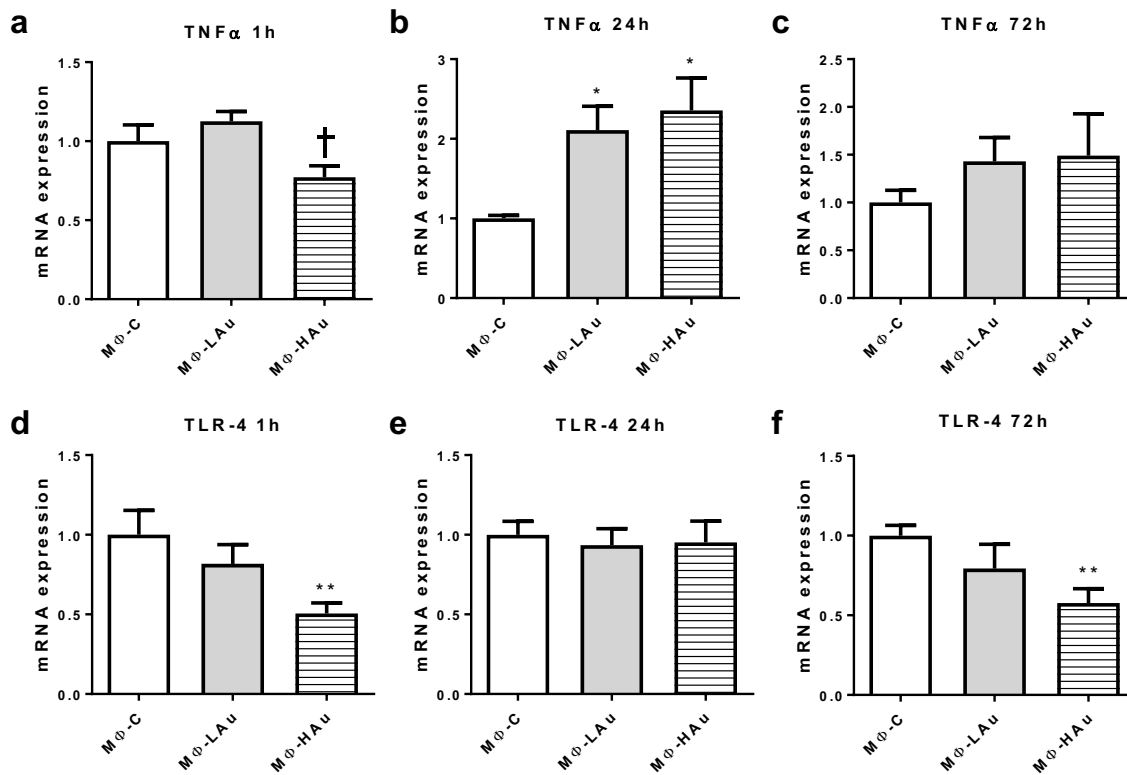

97

98 **Supplementary Figure 3S:** mRNA expression of (a-c) TNF $\alpha$  and (d-f) TLR-4 in AuNP-treated RAW  
 99 264.7 macrophages control (MΦ-C), low dose AuNP (MΦ-LAu, 0.315  $\mu$ g/ml, and high dose AuNP  
 100 (MΦ-HAu, 3.15  $\mu$ g/ml) cultures at 1, 24 and 72h. Results are expressed as mean  $\pm$  S.E.M, relative to  
 101 18s. Data were analyzed by one-way ANOVA followed by *post hoc* Bonferroni test.  
 102 \*  $P < 0.05$  vs. MΦ-C; \*\*  $P < 0.01$  vs. MΦ-C, †  $P < 0.05$  vs. MΦ-LAu;  $n = 10$ .

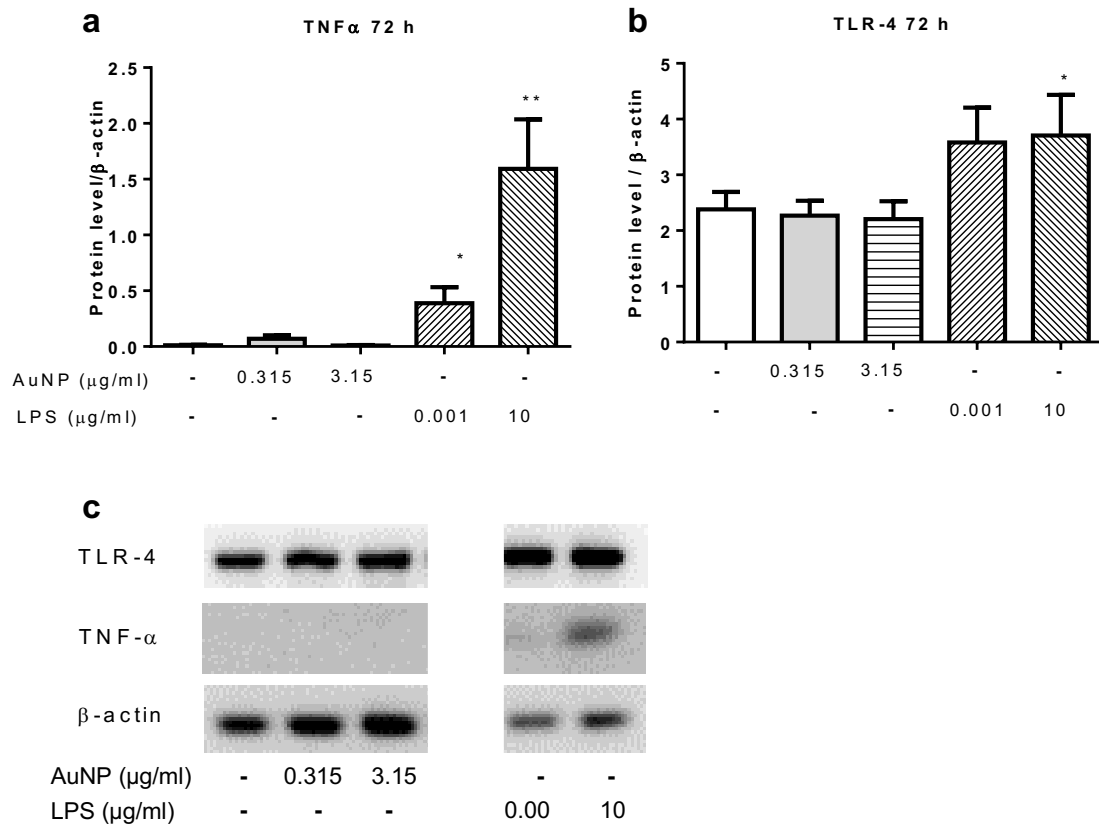

103

104 **Supplementary Figure S4:** Effect of AuNP treatment on TLR-4 (a) and TNF $\alpha$  (b) protein levels in  
 105 RAW 264.7 macrophages (M $\Phi$ ). (c) shows the representative western blots. Results are expressed as  
 106 mean  $\pm$  S.E.M. Data were analyzed by one-way ANOVA followed by *post hoc* Bonferroni test, \*  
 107  $P < 0.05$  vs. control; \*\*  $P < 0.01$  vs. control;  $n = 4$ . M $\Phi$ -C: control; M $\Phi$ -L: 0.315  $\mu$ g/ml, low dose AuNP  
 108 treatment; M $\Phi$ -H: 3.15  $\mu$ g/ml high dose AuNP treatment.



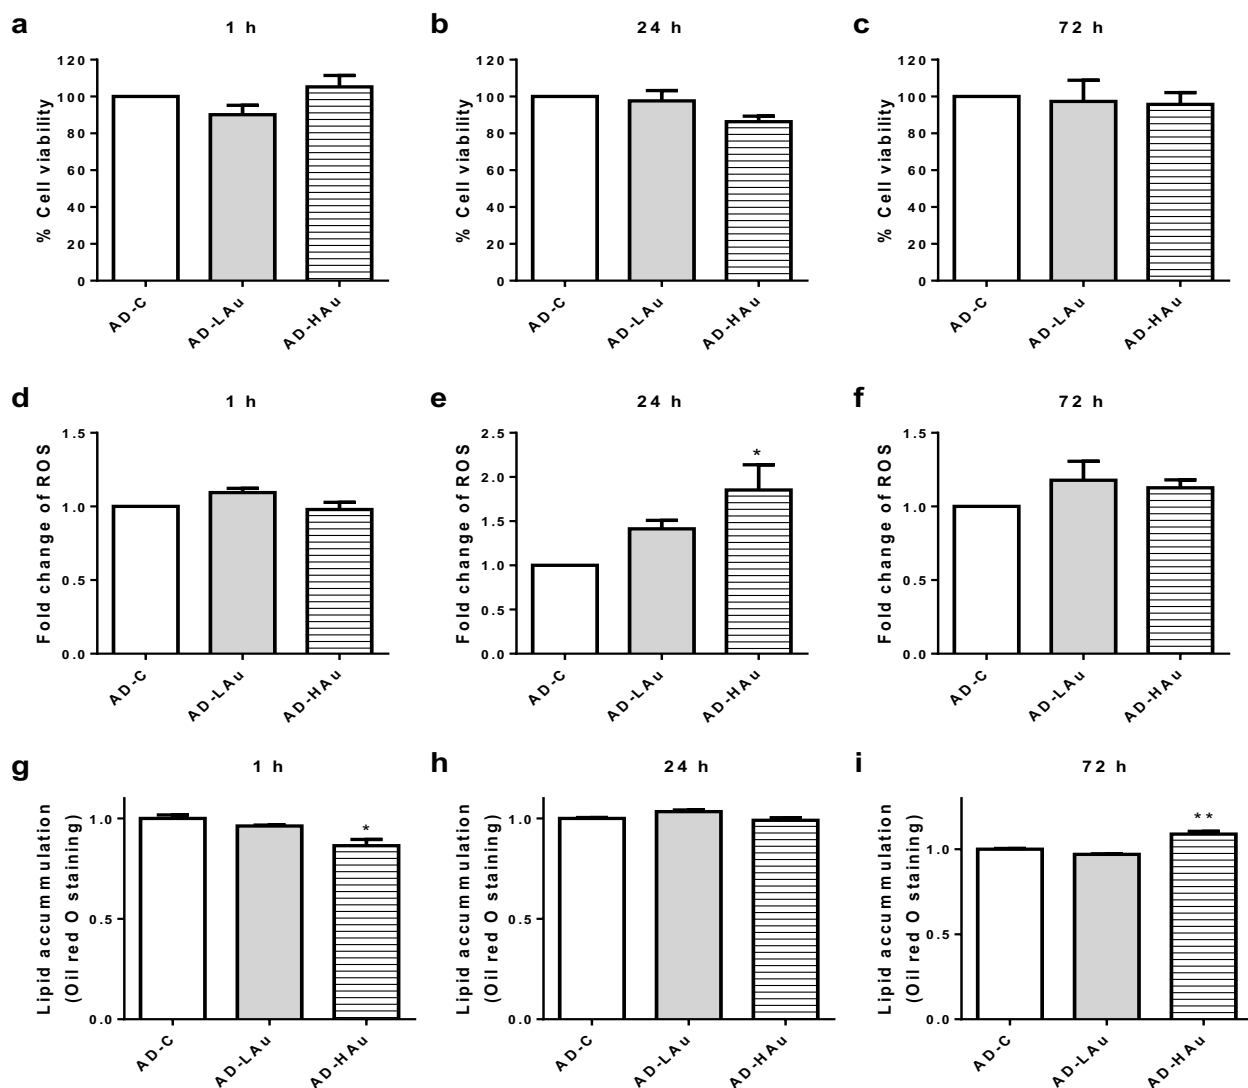

109

110 **Supplementary Figure S5:** Cell viability (a–c), ROS productions standardized by cell viability (d–  
 111 f), and lipid accumulation (g–i) in mature 3T3-L1 adipocytes control (AD-C), 0.315  $\mu\text{g/ml}$  AuNP  
 112 (AD-LAu) and 3.15  $\mu\text{g/ml}$  AuNP (AD-HAu) cultures at 1, 24 and 72 h. Results are expressed as  
 113 percentage mean  $\pm$  S.E.M. Data were analyzed by one-way ANOVA followed by *post hoc*  
 114 Bonferroni test, \*  $P < 0.05$  vs. AD-C; \*\*  $P < 0.05$  vs. AD-C;  $n = 2-3$ .

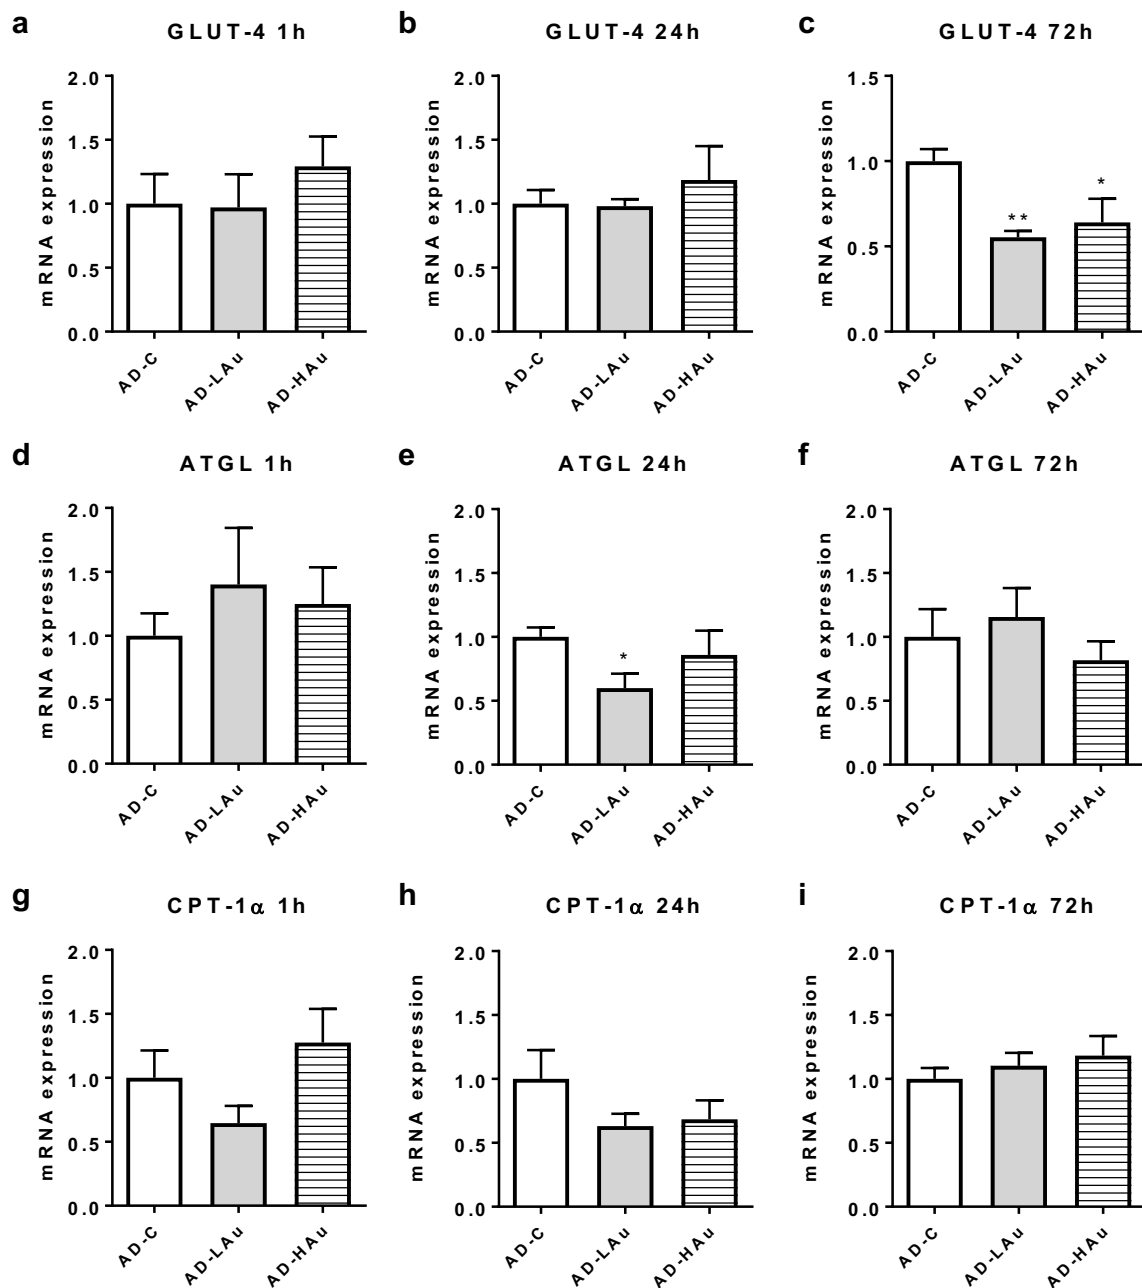

115

116 **Supplementary Figure S6:** mRNA expression of (a-c) GLUT-4, (d-f) ATGL, and (g-i) CPT-1 $\alpha$  in  
 117 3T3-L1 adipocytes with control (AD-C), low dose AuNP (AD-LAu, 0.315  $\mu$ g/ml), high dose AuNP  
 118 (AD-HAu, 3.15  $\mu$ g/ml) treatment at 1, 24 and 72h. Results are expressed as mean  $\pm$  S.E.M, relative  
 119 to 18S. Data were analyzed by one-way ANOVA followed by *post hoc* Bonferroni test. \*  $P < 0.05$  vs.  
 120 AD-C, \*\*  $P < 0.01$  vs. AD-C;  $n=8$ .

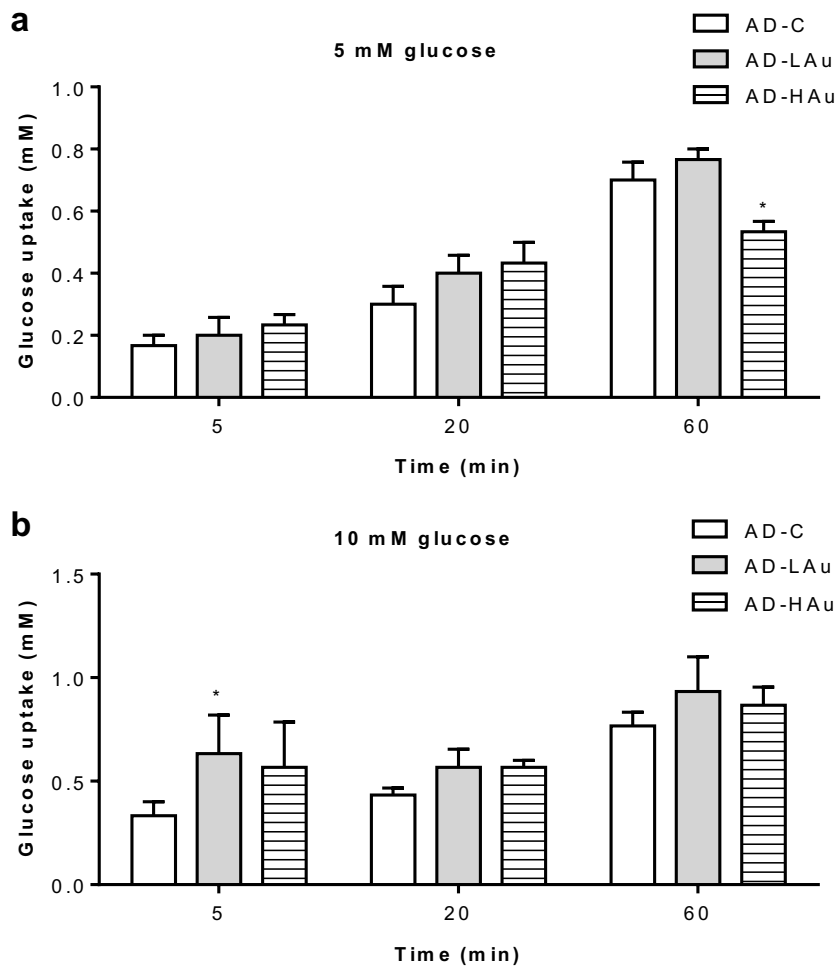

121

122 **Supplementary Figure S7:** Insulin-mediated glucose uptake in mature adipocytes pre-treated with  
 123 PBS (AD-C), 0.315  $\mu\text{g/ml}$  AuNP (AD-LAu), and 3.15  $\mu\text{g/ml}$  AuNP (AD-HAu) for 5, 20, and 60min,  
 124 in ambient glucose concentrations of 5mM (a) and 10mM (b). Results are expressed as mean  $\pm$  S.E.M.  
 125 Data were analyzed by one-way ANOVA with repeated measures followed by *post hoc* Bonferroni  
 126 test at each time point, \*  $P < 0.05$  vs. AD-C;  $n=3$ .

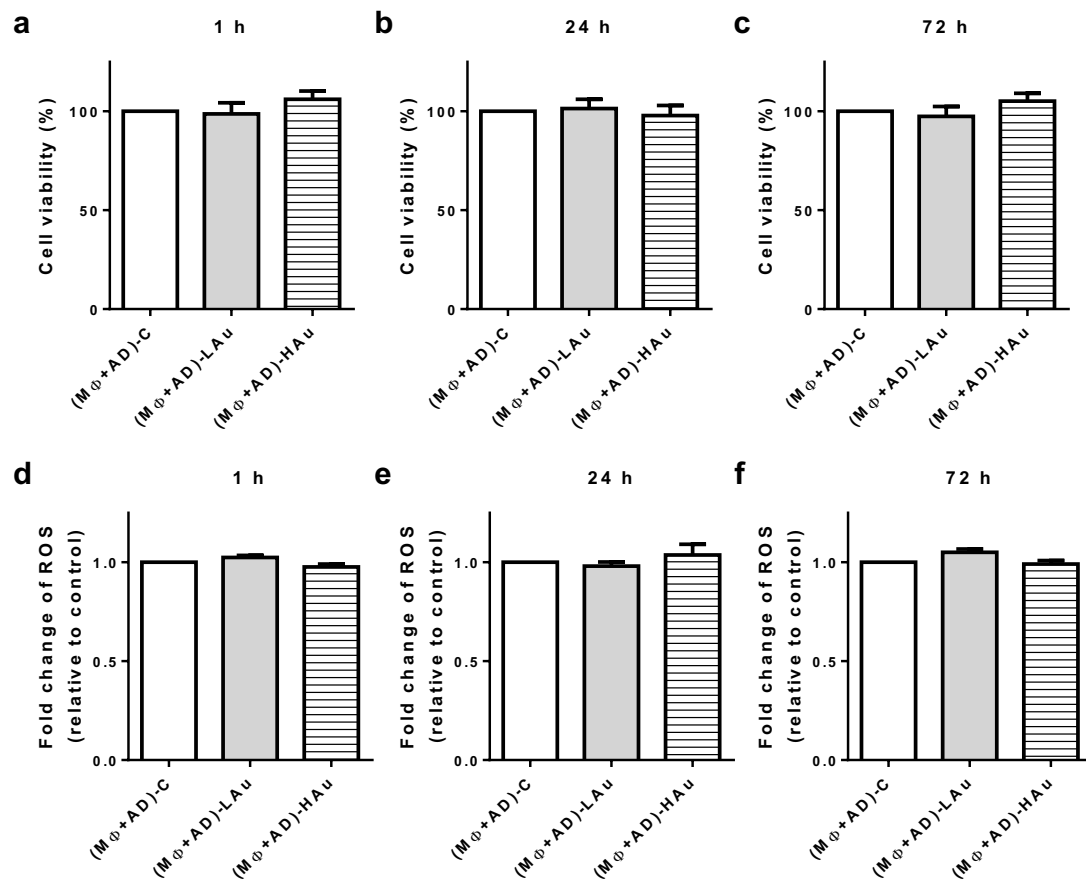

127

128 **Supplementary Figure S8.** Cell viability (a–c) and ROS productions standardized by cell viability  
 129 (d–f) in AuNP treated 3T3-L1 adipocytes and RAW 264.7 macrophages co-culture control  
 130 (MΦ+AD)-C, 0.315 μg/ml AuNP (MΦ+AD)-LAu, and 3.15 μg/ml AuNP (MΦ+AD)-HAu at 1, 24h,  
 131 and 72h. Results are expressed as mean ± S.E.M. Data were analyzed by one-way ANOVA followed  
 132 by *post hoc* Bonferroni test; \*  $P < 0.05$  vs. AD-C;  $n = 3$ .

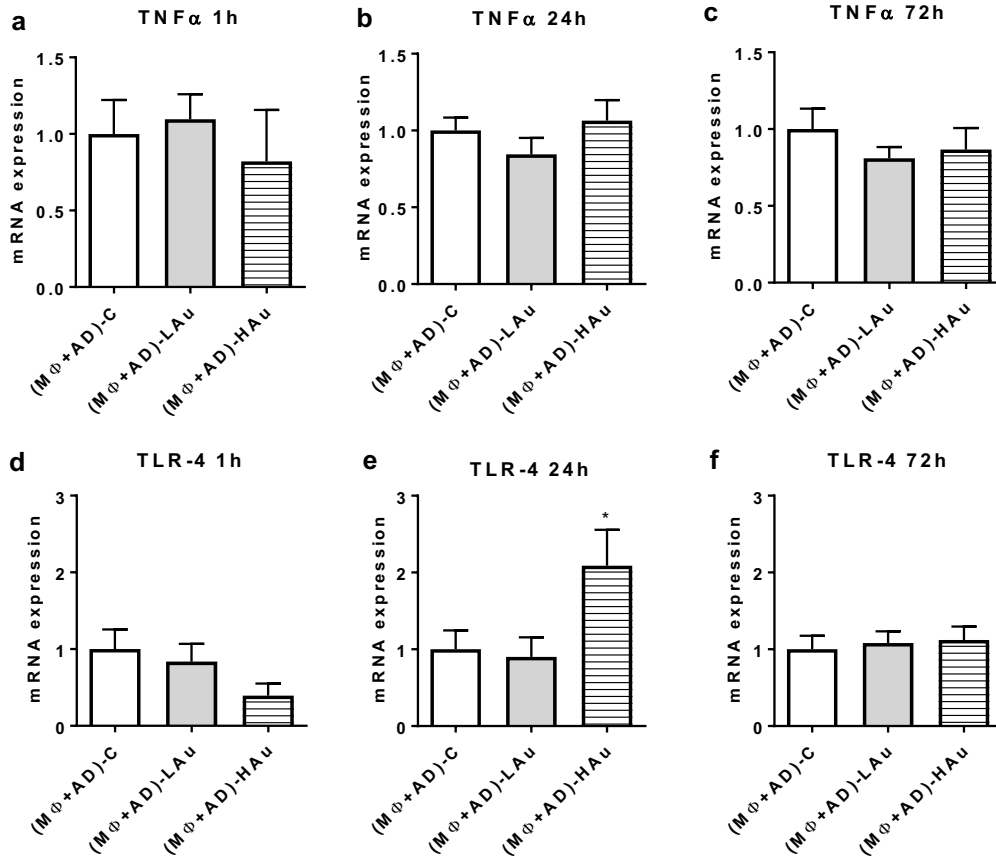

133

134 **Supplementary Figure S9:** mRNA expression of pro-inflammatory markers in AuNP-treated 3T3-  
 135 L1 adipocytes and RAW 264.7 macrophages co-culture (M $\Phi$ +AD) at 1h (a,d), 24h (b,e), and 72h  
 136 (c,f). Results are expressed as mean  $\pm$  S.E.M, relative to 18s. Data were analyzed by one-way  
 137 ANOVA followed by *post hoc* Bonferroni test, \*  $P < 0.05$  vs. (M $\Phi$ + AD)-C; n=10/group.

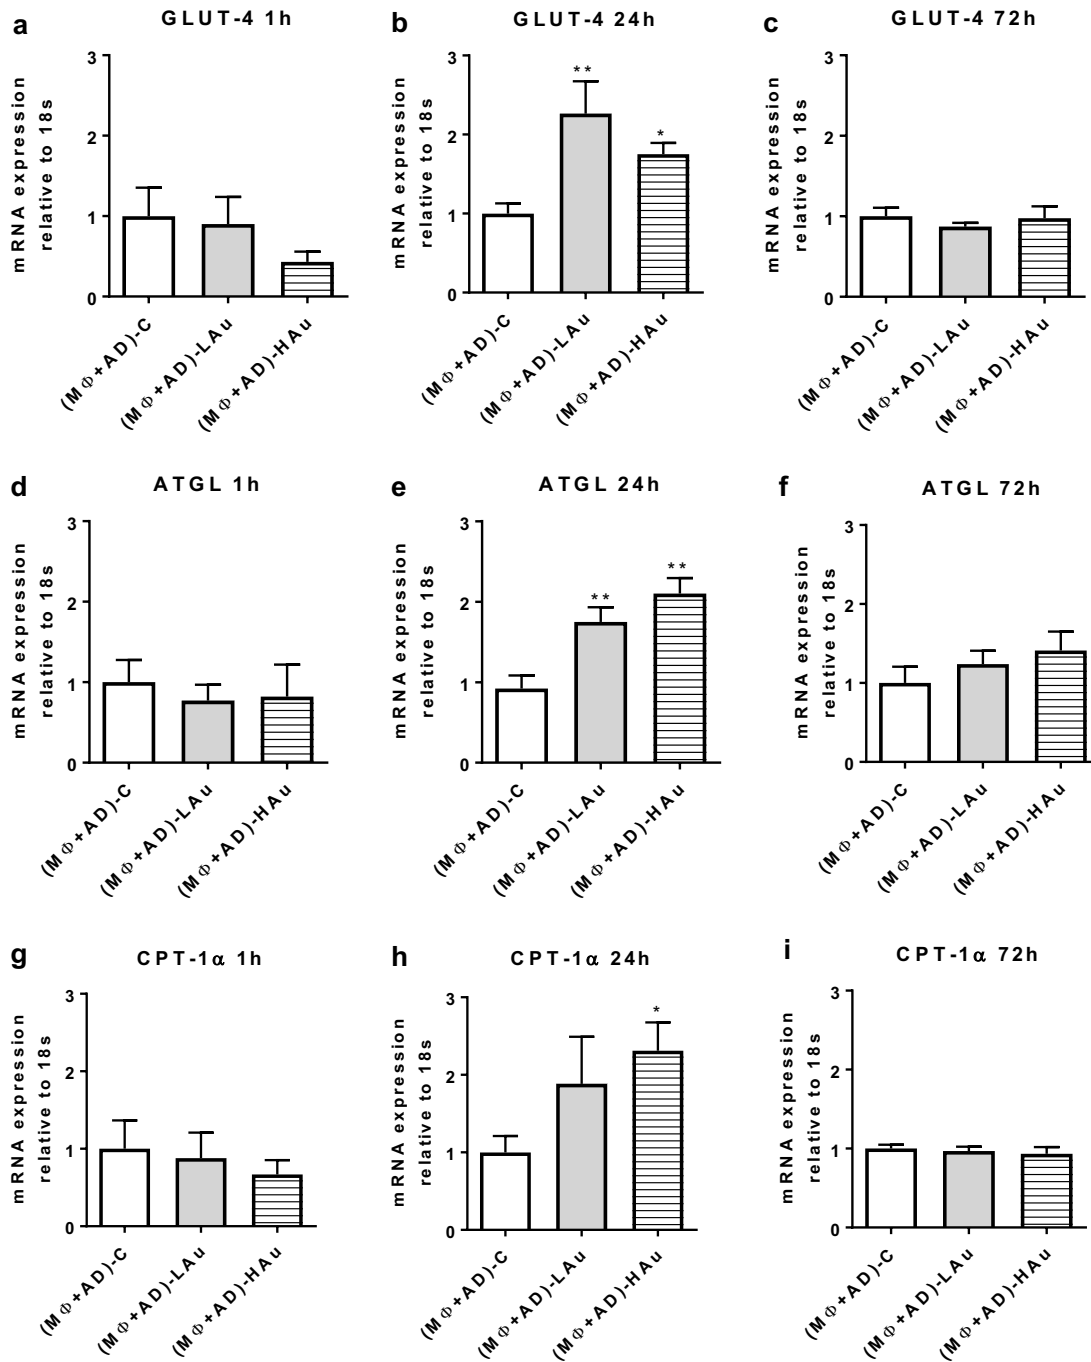

138

139 **Supplementary Figure S10** mRNA expression of adipokines in AuNP-treated 3T3-L1 adipocytes  
 140 and RAW 264.7 macrophages co-culture (M $\Phi$ +AD) at 1h (A–D), 24h (E–H), and 72h (I–L). Results  
 141 are expressed as mean  $\pm$  S.E.M, relative to 18s. Data were analyzed by one-way ANOVA followed  
 142 by *post hoc* Bonferroni test, \*  $P < 0.05$  vs. (M $\Phi$ +AD)-C;  $n = 10$ .

143

144

145 *Synthesis of gold nanoparticles:*

146 A quantity of colloidal suspension of gold nanoparticles was prepared by repeat applications of the  
147 'citrate' method. Briefly, glassware, thermometer and Teflon stirrer bar were cleaned in *aqua regia*  
148 (3 parts of concentrated HCl plus to one part of concentrated HNO<sub>3</sub>) before use. (Extreme cleanliness  
149 is essential if a stable sol is required.) Tetrachloroauric acid (HAuCl<sub>4</sub>.3H<sub>2</sub>O ) was used to make up a  
150 1 mM starting solution. This was transferred to a 250 ml conical flask for heating and stirred  
151 continuously. When the temperature reached 90 to 100°C, 10 ml of 38.8 mM sodium citrate was  
152 added as quickly as possible. After a few seconds the characteristic deep burgundy of gold nanosphere  
153 sols was attained. The sol was held at 90°C for a further 15 minutes after which the solution was  
154 removed from the heater. The resulting particles were of the order of 20 to 25 nm in diameter, Figure  
155 S11. The absorbance peak was at 526 nm in the as-prepared state, Figure S12. The method described  
156 yields a consistent and reproducible product. These sols are stable at least two years provided that  
157 they are stored in very clean containers. The presence of even tiny quantities of ions of other  
158 multivalent metals will cause the colloids to precipitate.

159

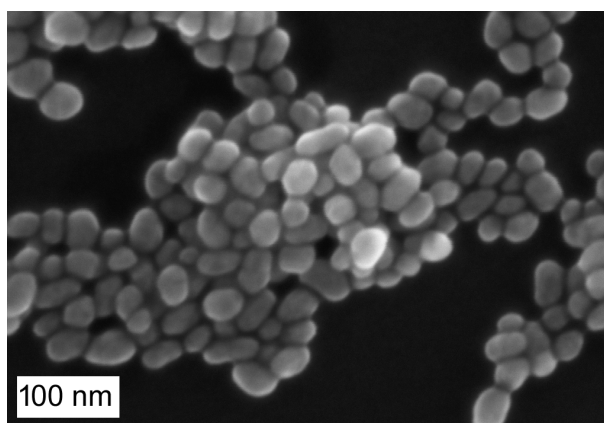

160

161 **Supplementary Figure S11.** Scanning electron microscope image of sample of Au NPs produced by  
162 our standardized 'citrate method' described above. (Image courtesy of Dr R. Wuhner and Ms A.  
163 Dorrigan.)

164

165

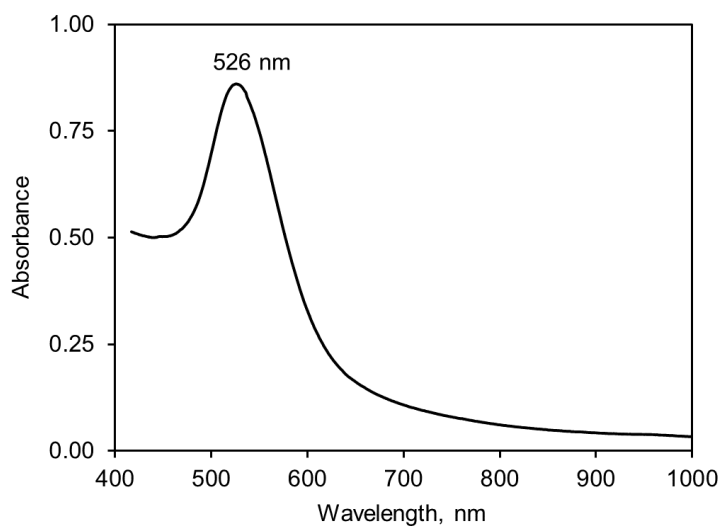

166

167 **Supplementary Figure S12.** UV-vis absorbance spectrum of Au NP colloid produced by our  
168 standardized 'citrate method' described above. (Data courtesy of Dr D. Pissuwan.)

169



170 **Supplementary Table S1:** TaqMan® gene expression assays probe information provided by the  
 171 manufacture (Life Technology, CA, USA).

| <b>Gene</b>    | <b>NCBI gene references</b> | <b>FAM-labeled Probes (5' → 3')</b> | <b>Assay ID</b> |
|----------------|-----------------------------|-------------------------------------|-----------------|
| 18S            | X03205.1                    | ACCGCAGCTAGGAATAATGGA               | 4319413E        |
| ATGL           | NM_025802.3                 | CCAAGACTGAATGGCTGGATGGCAA           | Mm00503040_m1   |
| CPT-1 $\alpha$ | NM_031559.1                 | CCAGGAGAGTGCCAGGAGGTCATAG           | Mm00550438_m1   |
| GLUT4          | NM_009204.2                 | GGCTCTGCTGCTGCTGGAACGGGTT           | Mm00436615_m1   |
| Leptin         | NM_008493.3                 | TCACACACGCAGTCGGTATCCGCCA           | Mm00434759_m1   |
| TNF $\alpha$   | NM_001278601.1              | GACCCTCACACTCAGATCATCTTCT           | Mm00443258_m1   |
| TLR-4          | NM_021297.2                 | CCCTGCATAGAGGTAGTTCCTAATA           | Mm00445273_m1   |

172

173 **Supplementary Table S2.** SYBR® Green expression assays primer information

| <b>Marker</b> | <b>Forward primer sequence (5' → 3')</b> | <b>Reverse primer sequence (5' → 3')</b> |
|---------------|------------------------------------------|------------------------------------------|
| Adiponectin   | CCACTTTCTCCTCATTCTG                      | CTAGCTTCAGTTGTAGTAAC                     |
| SREBP-1c      | AATAAATCTGCTGTCTTGCG                     | CCTTCAGTGATTTGCTTTTG                     |
| FAS           | TGAATGCCTCAAATCTTAGC                     | TTTAGCTTCCTGGATTGTC                      |
| FOXO1         | AAACACATATTGAGCCACTG                     | TCTACTCTGTTTGAAGGAGG                     |
| F4/80         | CTCCAAGCCTATTATCTATACC                   | CTTCCACAATCTCAC                          |

174

175 **Supplementary Table S3. Concentration of gold measured in the organs**

| <b>Organ</b>                           | <b>Chow-C</b> | <b>HFD-C</b>  | <b>HFD-LAu</b>             | <b>HFD-HAu</b>                         |
|----------------------------------------|---------------|---------------|----------------------------|----------------------------------------|
| <b>(<math>\mu\text{g Au/g}</math>)</b> |               |               |                            |                                        |
| <b>Fat</b>                             | 0.1 $\pm$ 0.0 | 4.7 $\pm$ 1.4 | 7253 $\pm$ 3784* $\dagger$ | 29883 $\pm$ 3154* $\dagger$ $\ddagger$ |
| <b>Liver</b>                           | 2.4 $\pm$ 0.6 | 2.1 $\pm$ 0.6 | 128 $\pm$ 31* $\dagger$    | 1792 $\pm$ 1297* $\dagger$             |
| <b>Spleen</b>                          | 5.1 $\pm$ 2.4 | 3.8 $\pm$ 0.9 | 628 $\pm$ 148* $\dagger$   | 1943 $\pm$ 196* $\dagger$ $\ddagger$   |
| <b>Kidney</b>                          | 6.6 $\pm$ 1.8 | 1.3 $\pm$ 0.0 | 9.9 $\pm$ 1.7              | 23.8 $\pm$ 5.3* $\dagger$ $\ddagger$   |
| <b>Brain</b>                           | 1.9 $\pm$ 1.0 | 1.1 $\pm$ 0.2 | 2.7 $\pm$ 1.6              | 12.1 $\pm$ 4.9* $\dagger$ $\ddagger$   |
| <b>Heart</b>                           | 0.5 $\pm$ 0.2 | 0.3 $\pm$ 0.2 | 3.3 $\pm$ 2.2              | 2.1 $\pm$ 0.5                          |

176 Data are expressed in mean  $\pm$  S.E.M. Data were analyzed using one-way ANOVA, followed by *post*  
 177 *hoc* Bonferroni tests. \*  $P < 0.05$  vs. Chow-C;  $\dagger P < 0.05$  vs. HFD-C;  $\ddagger P < 0.05$  vs. HFD-LAu;  $n=3/\text{group}$ .

178 **Supplementary Table S4:** Effect of AuNP treatment on lipid metabolism in the 3T3-L1  
 179 adipocytes.

|                                                                       | AD-C             | AD-LAu           | AD-HAu           |
|-----------------------------------------------------------------------|------------------|------------------|------------------|
| <b>Diameter of lipid droplets per cell (<math>\mu\text{m}</math>)</b> |                  |                  |                  |
| <b>1 h</b>                                                            | 10.38 $\pm$ 0.62 | 9.68 $\pm$ 0.55  | 12.17 $\pm$ 0.61 |
| <b>24 h</b>                                                           | 6.01 $\pm$ 0.35  | 6.59 $\pm$ 0.38* | 5.06 $\pm$ 0.25  |
| <b>72 h</b>                                                           | 9.08 $\pm$ 0.40  | 9.12 $\pm$ 0.42  | 7.60 $\pm$ 0.52* |
| <b>Supernatant triglyceride (mM)</b>                                  |                  |                  |                  |
| <b>1 h</b>                                                            | 0.27 $\pm$ 0.04  | 0.21 $\pm$ 0.04  | 0.27 $\pm$ 0.03  |
| <b>24 h</b>                                                           | 0.79 $\pm$ 0.10  | 0.64 $\pm$ 0.07  | 0.86 $\pm$ 0.12  |
| <b>72 h</b>                                                           | 2.74 $\pm$ 0.34  | 2.71 $\pm$ 0.36  | 2.86 $\pm$ 0.54  |

180 Data were analyzed using one-way ANOVA, followed by *post hoc* Bonferroni tests. Results are  
 181 expressed as mean  $\pm$  S.E.M. \*  $P < 0.05$  vs. AD-C group;  $n=8$ .

182

183

184

185

186 **Reference**

187 1. Yamashita, A., *et al.* Macrophage - adipocyte interaction: marked interleukin - 6 production by  
 188 lipopolysaccharide. *Obesity* **15**, 2549-2552 (2007).

- 189 2. Zebisch, K., Voigt, V., Wabitsch, M. & Brandsch, M. Protocol for effective differentiation of  
190 3T3-L1 cells to adipocytes. *Analytical Biochemistry* **425**, 88-90 (2012).
- 191 3. Suganami, T., Nishida, J. & Ogawa, Y. A paracrine loop between adipocytes and macrophages  
192 aggravates inflammatory changes role of free fatty acids and tumor necrosis factor  $\alpha$ .  
193 *Arteriosclerosis, thrombosis, and vascular biology* **25**, 2062-2068 (2005).
- 194 4. Chou, J., *et al.* The therapeutic effect on bone mineral formation from biomimetic zinc  
195 containing tricalcium phosphate (ZnTCP) in zinc-deficient osteoporotic mice. *PLoS ONE* **8**,  
196 e71821 (2013).
